1 **Production and purification of human Hsp90 $\beta$  in**  
2 ***Escherichia coli***

3

4

5

6 Martina Radli<sup>1</sup>, Dmitry B. Veprintsev<sup>2,3</sup>, Stefan G. D. Rüdiger<sup>1\*</sup>

7

8 <sup>1</sup>Cellular Protein Chemistry, Bijvoet Center for Biomolecular Research, Science  
9 for Life, Utrecht University, Padualaan 8, 3584 CH Utrecht, The Netherlands

10 <sup>2</sup>Laboratory of Biomolecular Research, Paul Scherrer Institut, 5232 Villigen PSI,  
11 Switzerland

12 <sup>3</sup>Department of Biology, ETH Zürich, 8093 Zürich, Switzerland

13

14 \*Corresponding author:

15 E-mail: [s.g.d.rudiger@uu.nl](mailto:s.g.d.rudiger@uu.nl) (SGDR)

16

17

18

19 Running title: Production and purification of Hsp90

20

21

22 Keywords: Molecular chaperones, Protein folding, Protein chemistry, Hsp90,

23 Protein production

24 **Abstract**

25 The molecular chaperone Hsp90 is an essential member of the cellular  
26 proteostasis system. It plays an important role in the stabilisation and activation of  
27 a large number of client proteins and is involved in fatal disease processes e.g.  
28 Alzheimer disease, cancer and cystic fibrosis. This makes Hsp90 a crucial protein  
29 to study. Mechanistic studies require large amounts of protein but the production  
30 and purification of recombinant human Hsp90 in *E. coli* is challenging and  
31 laborious. Here we identified conditions that influence Hsp90 production and  
32 optimised a fast and efficient purification protocol. We found that the nutrient  
33 value of the culturing medium and the length of induction had significant effect on  
34 Hsp90 production in *Escherichia coli*. Our fast, single-day purification protocol  
35 resulted in a stable, well-folded and pure sample that was resistant to  
36 degradation in a reproducible manner. We anticipate that our results provide a  
37 useful tool to produce higher amount of pure, well-folded and stable recombinant  
38 human Hsp90 $\beta$  in *Escherichia coli* in an efficient way.

## 39 Introduction

40 The cellular proteostasis system evolved to maintain cellular health and stability  
41 and to protect cells from continuously occurring stress by a tight control of protein  
42 production, quality control, folding, trafficking, aggregation and degradation (1,2).  
43 Chaperones are crucial elements of the proteostasis system, they prevent protein  
44 misfolding and aggregation by various mechanisms and thereby contribute to  
45 cellular integrity (3).

46 The molecular chaperone Hsp90 is one of the most important element of  
47 the proteostasis system (4-7). It is involved in client protein folding, maturation,  
48 stabilisation, activation and assembly of large protein complexes (8,9). Typically,  
49 Hsp90 assists at late folding processes (10,11).

50 Hsp90 interacts with up to 10 % of the cellular proteome. Its main clients  
51 include transcription factors, kinases and hormone receptors (Didier Picard. Table  
52 of Hsp90 interactors. Available from:  
53 <https://www.picard.ch/downloads/Hsp90interactors.pdf>). Moreover, it has  
54 unconventional partners such as the disordered  $\alpha$ -synuclein and Tau (5,10).  
55 Hsp90 plays a crucial role in the progression of several diseases (such as cancer,  
56 cystic fibrosis and Alzheimer's disease) (12-14).

57 The Hsp90 chaperone machinery is extensively studied to understand its  
58 complex working mechanism and involvement with multiple fatal diseases.  
59 Typically, *in vitro* biochemical and biophysical experiments require high amount of  
60 recombinant protein with excellent sample purity and stability. Significant  
61 overproduction of the recombinant human Hsp90 $\beta$  is challenging since it is a

62 large, multi-domain protein. Moreover, Hsp90 is particularly sensitive to the  
63 proteolytic cleavage of the flexible, unfolded linkers between its domains,  
64 therefore a time consuming purification protocol may compromise sample quality.

65 We systematically tested several parameters to find the best conditions for  
66 the overproduction of recombinant human Hsp90 $\beta$ . Furthermore, we developed a  
67 fast and efficient purification protocol that results in pure and stable sample with  
68 reproducible quality. We found that the nutrient value of the medium and the  
69 length of induction time had significant effect on Hsp90 overproduction, whereas  
70 the concentration of induction agent (isopropyl  $\beta$ -D-1-thiogalactopyranoside  
71 (IPTG)), temperature and optical density (OD<sub>600</sub>) at induction (within the tested  
72 intervals) did not influence the process. The protein samples we purified with the  
73 optimised protocol were resistant to proteolysis upon incubation at physiological  
74 temperature up to one day. We showed that the folding, sedimentation and  
75 molecular weight of our Hsp90 sample corresponded to earlier results.

76

77 **Materials and Methods**

78

79 ***Wild type full length Hsp90 construct***

80 pet23a+ expression vector (Novagen) was used for His<sub>6</sub>-tagged wild type human  
81 Hsp90 production in Rosetta 2 *E. coli* strain (Novagen). The sequence of wild  
82 type Hsp90:

83 HHHHHMPPEEVHGGEEVETFAFQAEIAQLMSLIINTFYSNKEIFLRELISNASDALDKIRYESLTDPSKLD  
84 SGKELKIDIIIPNPQERTLTLVDITGIGMTKADLINNLGTIAKSGTKAFMEALQAGADISMIGQFGVGFYSAYL  
85 VAEKVVVITKHNDDQYAWESSAGGSFTVRADHGEPVIGRGTKVILHLKEDQTEYLEERRVKEVVKHSQFIG  
86 YPITLYLEKEREKEISDDEAEEKGEKEEEDKDDEEKPKIEDVGSDEEDDSGKDKKKKTKKIKEYIDQEEL  
87 NKTKPIWTRNPDDITQEEYGEFYKSLTNDWEDHLAVKHFSVEGQLEFRALLFIPRRAPFDLFENKKKNNIK  
88 LYVRRVFIMDSCDELIPEYLNFIIRGVVDSDELPLNISREMLQQSKILKVIRKNIVKKCLELFSELAEDKENY  
89 KKFYEAFSKNLKLGIHEDSTNRRRLSELLRYHTSQSGDEMTSLSEYVSRMKETQKSIYYITGESKEQVANS  
90 FVERVRKRGFEVVMTEPIDEYCVQQLKEFDGKSLVSVTKEGLELPEDEEEKKMEESKAKFENLCKLMKEI  
91 LDKKVEKVTISNRLVSSPCCIVTSTYGWTANMERIMKAQALRDNSTMGYMAKKHLEINPDHPIVETLRQKA  
92 EADKNDKAVKDLVLLFETALLSSGFSLEDPQTHSNRIYRMIKLGGLGIDEDVAAEEPNAAVPDEIPPLEGD  
93 EDASRMEEVD

94

95 ***Protein overproduction test - cell culturing***

96 Rosetta 2 cells containing pet23a+ vector with wild type full length Hsp90 were  
97 inoculated into 100 ml 2x yeast tryptone extract (2x YT; 12.8 g Bacto Tryptone  
98 (Merck), 8 g Bacto Yeast Extract (Merck), 4 g NaCl (Merck) in 800 ml demi water  
99 (Millipore)) medium supplemented with 34 mg/l final concentration of  
100 chloramphenicol (Sigma-Aldrich) and 100 mg/l final concentration of ampicillin  
101 (Sigma-Aldrich). The cells were grown over night at 37°C, shaking with 220 rpm.

102 Next morning 100 (for low OD<sub>600</sub>) or 200 (for high OD<sub>600</sub>) µl culture was  
103 inoculated into 4 ml lysogeny broth medium (LB; 8 g Bacto Tryptone, 4 g Bacto  
104 Yeast Extract, 4 g NaCl, 20 g tyamine (Sigma-Aldrich) in 800 ml demi water), 2x  
105 YT or terrific broth media (TB; 12 g Bacto Tryptone, 24 g Bacto Yeast Extract, 4  
106 ml glycerol in 800 ml demi water)) supplemented with 34 mg/l final concentration  
107 of chloramphenicol and 100 mg/l final concentration of ampicillin. The cultures  
108 were grown at 37°C, shaking with 180 rpm. The OD<sub>600</sub> was monitored every 1.5  
109 hours by using a 1:10 dilution of the culture in an Ultrospec 3000 pro UV/Visible  
110 Spectrophotometer (GE Healthcare). The cultures were induced at low (0.6-0.9)  
111 or high (1-1.3) OD<sub>600</sub> with 0.1/0.25/0.5 mM IPTG (Thermo Fisher Scientific). The  
112 cultures were incubated at 16°C or 18°C, the SDS-PAGE samples were taken  
113 before induction and 1/3/5 day(s) after induction.

114

### 115 **SDS-PAGE**

116 For the SDS-PAGE samples 0.5 ml of cell culture was taken and centrifuged for 1  
117 minute by 13,300 rpm. The supernatant was discarded and the pellet was  
118 resuspended in 200 µl of 1x sample buffer (0.625 M Tris (Sigma-Aldrich), 12.5 %  
119 glycerol (CARL ROTH), 1 % SDS (Bio-Rad), 0.005 % Bromophenol Blue (Bio-  
120 Rad), 5 mM freshly added β-mercaptoethanol (Sigma-Aldrich) 2x diluted with  
121 demi water (Millipore)) and homogenised by using a syringe of a very tiny  
122 diameter (BD Micro-Fine). This last step was essential for loading the samples on  
123 the gel.

124 15 % SDS gels were prepared (Separation buffer: 0.38 M Tris pH 8.8, 15  
125 % acrylamide (National Diagnostics), 0.1 % SDS, 0.1 % APS (Sigma-Aldrich),  
126 0.04 % TEMED (Sigma-Aldrich), Stacking buffer: 0.125 M Tris pH 6.8, 4 %  
127 acrylamide, 0.1 % SDS, 0.075 % APS, 0.1 % TEMED) and ran in 1x Laemmli  
128 buffer (0.025 M Tris base, 0.152 M glycine (SERVA Electrophoresis GmbH) , 0.1  
129 % SDS, diluted from 10x stock). The gels stained with Coomassie staining  
130 solution (0.2 % Coomassie Brilliant Blue (SERVA Electrophoresis GmbH), 45 %  
131 methanol (Interchema Antonides-Interchema), 10 % acetic acid (Biosolve) and 55  
132 % demi water and destained using destaining solution (30 % methanol, 10 %  
133 acetic acid and 60 % demi water).

134 The gels were scanned in a Epson Perfection V700 Photo scanner.  
135 Quantification of the lane profiles was done by using ImageJ. The lane profiles of  
136 the induced samples were normalised to the lane profile of the uninduced sample  
137 of the same gel using the intrinsic *E. coli* protein called EF-Tu. Subsequently, the  
138 lane profiles of induced samples were aligned to the uninduced sample using the  
139 first two bands in the beginning of the lanes. Finally, the uninduced lane profile  
140 was deducted from the induced lane profiles and the sum of each Hsp90 peak  
141 area was divided by the sum of the normalised EF-Tu peak area of the same lane  
142 to be able to compare the gels with each other.

143

#### 144 ***Overproduction and purification of wild type full length Hsp90***

145 Rosetta 2 cells containing pet23a+ vector with wild type full length Hsp90 were  
146 inoculated into 200 ml 2x YT medium supplemented with 34 mg/l final

147 concentration of chloramphenicol and 100 mg/l final concentration of ampicillin.  
148 The cells were grown over night at 37°C, with shaking at 220 rpm. Next morning  
149 200 ml culture was inoculated into 6x800 ml 2x YT supplemented with 34 mg/l  
150 final concentration of chloramphenicol and 100 mg/l final concentration of  
151 ampicillin. The cultures were grown at 37°C with shaking at 180 rpm and induced  
152 with 0.5 mM IPTG at OD<sub>600</sub> = 1. After induction the cells were incubated at 18°C  
153 for 5 days with shaking at 180 rpm.

154 The cells were harvested in an Avanti J-26 XP centrifuge (Beckman  
155 Coulter) using the JLA-8.1 rotor at 4°C at 4500 rpm for 30 minutes. The  
156 supernatant was discarded and the pellet was resuspended in ice cold  
157 resuspension-buffer (50 mM Na-phosphate pH 7.2 (Sigma-Aldrich), 150 mM  
158 NaCl, 150 mM KCl (CARL ROTH)) and centrifuged in an MSE Harrier 18/80  
159 Refrigerated Benchtop Centrifuge at 4°C at 5000 rpm for 30 minutes. The  
160 supernatant was discarded and the pellet was stored at -20°C until further usage.

161 The pellet was resuspended in ice cold lysis buffer (12.5 mM Na-  
162 phosphate pH 7.2, 75 mM NaCl, 5 mM β-mercaptoethanol, EDTA-free protease  
163 inhibitor (1 tablet/50 ml) (Roche)). The cells were disrupted by an EmulsiFlex-C5  
164 (Avestin) cell disruptor. The lysate was centrifuged in Avanti J-26 XP centrifuge  
165 using JA-25.5 rotor at 21,000 rpm for 45 minutes at 4°C. The lysate was filtered  
166 by 22 μm polypropylene filter (VWR) to remove the cell debris and insoluble  
167 aggregates. The purification was done using an AKTA Purifier (GE Healthcare).

168 Wild type full length Hsp90 was first purified on an IMAC POROS 20MC  
169 (Thermo Fischer Scientific) affinity purification column (solutions connected to



170 pump A1 and A2: 50 mM Na-phosphate buffer pH 8.0 with 300 mM NaCl, B1:  
171 demi water with 10 mM  $\beta$ -mercaptoethanol, B2: 1 M imidazole (Sigma-Aldrich)).  
172 The eluted sample was diluted 4-fold with dilution buffer (25 mM Na-phosphate  
173 buffer pH 7.2, 5 mM DTT (Sigma-Aldrich), complete protease inhibitor (1 tablet/50  
174 ml) (Roche)). Next the sample was loaded on a POROS 20HQ anion exchange  
175 column (Thermo Fischer Scientific) (solutions connected to pump A1 and A2: 50  
176 mM Na-phosphate pH 7.2, B1: demi water with 10 mM DTT, B2: 2 M KCl). The  
177 eluted sample was diluted 10-fold with dilution buffer (25 mM Na-phosphate  
178 buffer pH 7.2, 5 mM DTT, complete protease inhibitor (1 tablet/100 ml)). Finally,  
179 the sample was loaded on a HiTrap heparin affinity chromatography column (GE  
180 Healthcare) (solutions connected to pump A1 and A2: 25 mM Na-phosphate pH  
181 7.2, B1: demi water with 10 mM DTT, B2: 2 M KCl). The eluate was concentrated  
182 and buffer exchanged to Hsp90 storage buffer (25 mM Na-phosphate pH 7.2, 150  
183 mM NaCl, 150 mM KCl), 5 mM DTT, complete protease inhibitor (1 tablet/100  
184 ml)) using a Vivaspin 20 column (50 kDa MWCO) (GE Healthcare) at 4°C at 5000  
185 rpm for 15-15 minutes until above 100  $\mu$ M protein concentration. The protein  
186 concentration was determined with ND-1000 program on an ND-1000  
187 Spectrophotometer type NanoDrop using 57760  $M^{-1}cm^{-1}$  extinction coefficient.  
188 The sample was aliquoted, frozen in liquid N<sub>2</sub> and stored at -80°C. Throughout  
189 the purification procedure samples were taken from the steps of the purification  
190 that were run on SDS-PAGE to analyse sample purity.

191

192 ***Protein stability***

193 10  $\mu$ M concentration Hsp90 was incubated in Hsp90-buffer ((25 mM Na-  
194 phosphate pH 7.2, 150 mM NaCl, 150 mM KCl, 5 mM DTT, complete protease  
195 inhibitor (1 tablet/100 ml)) for 24 hours at 4°C, room temperature (~21°C) and  
196 37°C. SDS-PAGE samples were taken and mixed with 2x sample buffer (1.25 M  
197 Tris, 25 % glycerol, 2 % SDS, 0.01 % Bromophenol Blue, 5 mM freshly added  
198 DTT) at 0/3/18/24 hours. The samples were analysed on SDS-PAGE.

199

200 ***Silver staining***

201 The Coomassie-stained and destained gels were fixed for 30 minutes in fixation  
202 solution (30 % ethanol (Interchema Antonides-Interchema), 10 % acetic acid, 60  
203 % demi water). The gel was washed 3-times for 20 minutes in 50 % ethanol, then  
204 pre-treated for 1 minute with 0.02 %  $\text{Na}_2\text{S}_2\text{O}_3$  (Scharlau Chemicals) [100x diluted  
205 from stock (stock: 2 g into  $\text{Na}_2\text{S}_2\text{O}_3$  100 ml water (Milli-Q))] and quickly rinsed 4  
206 times with demi water. The gels were impregnated for 20 minutes with freshly  
207 prepared staining solution (2 g/l  $\text{AgNO}_3$  (Merck) and 0.75 ml/l formaldehyde  
208 (Calbiochem)). Next they were quickly rinsed 4 times with demi water, then  
209 developed till the desired result in developer solution (60 g/l  $\text{Na}_2\text{CO}_3$  (Sigma-  
210 Aldrich), 0.5 ml/liter formaldehyde and 0.0004 %  $\text{Na}_2\text{S}_2\text{O}_3$  stock). The reaction  
211 was stopped in fixation solution (30 % ethanol, 10 % acetic acid, 60 % demi  
212 water) for 10 minutes. The gel was stored in 1 % acetic acid solution and  
213 scanned by Epson Perfection V700 Photo scanner.

214

215 ***CD spectroscopy***

216 The protein was centrifuged on 4°C for 15 minutes at 13,300 rpm in Heraeus Pico  
217 17 centrifuge (Thermo Scientific). The concentration was determined with ND-  
218 1000 program on ND-1000 Spectrophotometer type NanoDrop using 57760 M<sup>-1</sup>  
219 cm<sup>-1</sup> extinction coefficient. The protein was diluted to 0.1 g/l concentration with  
220 CD-buffer (25 mM Na-phosphate pH 7.2 buffer, 150 mM NaF (Sigma-Aldrich)),  
221 loaded into a Teflon-sealed, polarimetrically checked quartz glass cuvette with an  
222 optical path length of 1 mm and a volume of 350 µl (Hellma Analytics). Far-UV  
223 CD spectrum was measured with the Spectra Manager (Jasco) program on a  
224 Jasco J-810 Spectropolarimeter instrument (Jasco). Experimental parameters  
225 included a wavelength increment of 1 nm, a scan speed of 20 nm/min, a  
226 temperature of 20°C). The data were analysed by MS Excel.

227

228 ***SEC-MALLS***

229 The protein sample was centrifuged and its concentration was measured as  
230 described in the *CD spectroscopy* part. 10 µl of ~29 g/l sample was run with  
231 Shimadzu on a Superdex 200 column with 0.35 ml/min speed in running buffer  
232 (25 mM Na-phosphate pH 7.2, 150 mM NaCl, 5 mM freshly added DTT). The 220  
233 nm absorption was detected by SPD-20A UV detector (Shimadzu), light  
234 scattering by Wyatt COMET<sup>TM</sup> light scattering detector (Wyatt Technology) and  
235 the refractive index by the RID-10A refractive index detector (Shimadzu). The  
236 data were analysed by program Astra 6.

237

238 ***Analytical Ultracentrifugation (AUC)***

239 The protein sample was centrifuged and its concentration was measured as  
240 described in the *CD spectroscopy* part. The protein sample was diluted to 7.2  $\mu$ M  
241 concentration with Hsp90-buffer (25 Na-phosphate pH 7.2, 150 mM NaCl, 150  
242 mM KCl, complete protease inhibitor (1 tablet/50 ml), 5 mM freshly added DTT).  
243 The sample was centrifuged on 20°C for 16 hours at 42,000 rpm in a Beckman  
244 XL-I ultracentrifuge using An60Ti rotor. We used absorbance detection optics for  
245 our experiment. The data was analysed by SedFit (Schuck, 2000).

246 **Results**

247

248 ***Systematic testing of recombinant human Hsp90 $\beta$  overproduction***

249 We set out to systematically test the effect of key parameters on recombinant  
250 human Hsp90 $\beta$  production in Rosetta 2 cells and to identify conditions resulting in  
251 high protein levels.

252 We outlined our study as follows: We cultured *E. coli* cells containing  
253 human Hsp90 $\beta$  open reading frame on a pET23a+ vector and tested media with  
254 different nutrient values and different temperature of induction to modulate the  
255 metabolism of *E. coli* cells. We induced the cultures with different final  
256 concentration of IPTG affecting the level of T7 polymerase. We also varied the  
257 length of induction and the OD<sub>600</sub> value at induction, because in case of certain  
258 proteins these are essential parameters for successful overproduction.

259 At given time points we took samples from the cultures and ran them on  
260 SDS-gels (**Figure 1A**). We loaded protein marker in the first, uninduced sample  
261 in the second and purified Hsp90 in the last lanes of the SDS-gels. These  
262 samples helped to identify the Hsp90 bands that appeared after induction. Lane  
263 3-14 contained the induced samples of the different conditions tested. The most  
264 abundant intrinsic *E. coli* band that we later used for quantification (EF-Tu) and  
265 Hsp90 bands are marked on the right of the gels (**Figure 1A**) (15).

266

267 ***Figure 1: Experimental set up and quantification scheme for Hsp90***  
268 ***overproduction. (A) Schematic overview of the protein production experiment.***

269 *E. coli* cells containing human Hsp90 $\beta$  open reading frame were inoculated from  
270 glycerol stock and cultured overnight at 37°C. The culture was divided into small  
271 tubes and after induction the tubes were incubated in different conditions. Gel  
272 samples were taken at day 1, 3 and day 5 and were run on SDS-PAGE. (B)  
273 Schematic representation of the quantification of Hsp90 overproduction. The  
274 intensity profiles of uninduced (orange) and induced lanes (green) were  
275 determined and the induced lane profile were normalised to the uninduced lane  
276 profile using the EF-Tu peak of the uninduced lane as reference (100 %) (top  
277 panel). Subsequently, the induced lane profiles were aligned to the uninduced  
278 lane profile using the first two left peaks (stars) of the uninduced lane profile as  
279 reference points (middle panel). The uninduced lane profile was deducted from  
280 the normalised and aligned induced lane profiles and the sum of difference at the  
281 height of the Hsp90 peak was calculated (red area) (lower panel). Finally, the  
282 Hsp90 peak area was divided by the normalised and aligned EF-Tu peak area.

283

284 We determined the intensity profile of the uninduced (green) and induced lanes  
285 (orange) (**Figure 1B**, top panel) and normalised the induced lane profile to the  
286 uninduced lane profile using the EF-Tu peak of the uninduced lane as reference  
287 (100 %). Subsequently, we aligned the induced lane profile (green) to the  
288 uninduced lane profile (orange) using the first two left peaks (stars) of the  
289 uninduced lane profile as reference points (**Figure 1B**, middle panel). We  
290 deducted the uninduced lane profile (orange) from the normalised and aligned  
291 induced lane profile (green) and calculated the sum of difference at the height of

292 the Hsp90 peak (red area) (**Figure 1B**, lower panel). Finally, we divided the  
293 Hsp90 peak area by the area of the normalised and aligned EF-Tu peak.

294

295 ***The yield of recombinant human Hsp90 $\beta$  protein in E. coli using LB medium***  
296 ***was insufficient for preparative purposes***

297 We tested Hsp90 overproduction in LB medium varying the length of induction,  
298 the temperature, the OD<sub>600</sub> at induction and the IPTG concentration to measure if  
299 any of these parameters modulated the levels of the chaperone.

300 After one and three days of induction no Hsp90 band appeared in the  
301 induced samples, none of the conditions led to sufficient Hsp90 overproduction  
302 (**Figure 2A and B**, lane 3-14). When induced for five days an Hsp90 band was  
303 apparent in several conditions (**Figure 2C**, lane 4, 5, 11 and 12). However, the  
304 yield was still insufficient for preparative purposes and the production levels were  
305 variable.

306

307 ***Figure 2: Hsp90 overproduction in LB medium lead to insufficient protein***  
308 ***yield. Hsp90 overproduction after 1 day (A), 3 days (B), 5 days (C) of induction.***  
309 ***Lane 1: protein marker, lane 2: uninduced sample, lane 3-8: protein production at***  
310 ***16°C, lane 9-14: protein production at 18°C, lane 3-5 and 9-11: induction at low***  
311 ***OD<sub>600</sub>, lane 6-8 and 12-14: induction at high OD<sub>600</sub>, lane 3, 6, 9, 12: induction with***  
312 ***0.1 mM IPTG, lane 4, 7, 10, 13: induction with 0.25 mM IPTG, lane 5, 8, 11, 14:***  
313 ***induction with 0.5 mM IPTG, lane 15: purified Hsp90 sample. EF-Tu intrinsic E.***  
314 ***coli protein band was used for quantification of Hsp90 overproduction.***

315 ***2x YT medium improved the yield of Hsp90 production***

316 Since protein production in LB resulted in poor yields we hypothesised that the  
317 nutrient value of the medium may be a critical parameter in case of Hsp90.  
318 Therefore, we repeated the overproduction experiment in the richer 2x YT  
319 medium. We varied the length of induction, the temperature, the OD<sub>600</sub> at  
320 induction and the IPTG concentration to determine if any these parameters affect  
321 Hsp90 production in 2x YT.

322 After one and three days of induction a new band appeared at the height  
323 of Hsp90 in the induced samples, suggesting that we could produce the  
324 chaperone (**Figure 3A and B**). The newly appearing Hsp90 band is stronger after  
325 three days of induction compared to one. Hsp90 production in 2x YT resulted in  
326 higher yields than in LB within the interval of the parameters we varied.

327

328 ***Figure 3: Hsp90 overproduction was improved but still insufficient in 2x YT***  
329 ***compared to LB. Hsp90 overproduction after 1 day (A), 3 days (B), 5 days (C) of***  
330 ***induction. Lane 1: protein marker, lane 2: uninduced sample, lane 3-8: protein***  
331 ***production at 16°C, lane 9-14: protein production at 18°C, lane 3-5 and 9-11:***  
332 ***induction at low OD<sub>600</sub>, lane 6-8 and 12-14: induction at high OD<sub>600</sub>, lane 3, 6, 9,***  
333 ***12: induction with 0.1 mM IPTG, lane 4, 7, 10, 13: induction with 0.25 mM IPTG,***  
334 ***lane 5, 8, 11, 14: induction with 0.5 mM IPTG, lane 15: purified Hsp90 sample.***  
335 ***EF-Tu intrinsic E. coli protein band was used for quantification of Hsp90***  
336 ***overproduction.***

337



338 When induced for five days, we observed significant overproduction of the  
339 chaperone (**Figure 3C**) in certain cases (lane 7-9), whereas other conditions led  
340 to similar results to those observed on previous gels (lane 10, 12). Hsp90  
341 production levels were variable in the different conditions. We concluded that  
342 Hsp90 overproduction resulted in higher yields in 2x YT after five days of  
343 induction compared to shorter induction times and culturing in LB medium, but  
344 the yields were still insufficient for preparative purposes.

345

346 ***Recombinant human Hsp90 $\beta$  production had the best yield in the *E. coli****  
347 ***cells in TB medium***

348 Since the richer 2x YT medium had a positive effect on Hsp90 levels we decided  
349 to test the protein production in TB medium which is higher in nutrients than 2x  
350 YT. We varied the same parameters as described previously.

351 After one day of induction, a strong band appeared at the height of Hsp90  
352 in several conditions (**Figure 4A**, lane 3 and 11) indicating that overproduction in  
353 TB was notable. The conditions that resulted in high protein amount, however,  
354 were variable. Already after three days of induction in TB medium resulted all the  
355 conditions tested in a strong Hsp90 band (**Figure 4B**). We observed similar  
356 Hsp90 levels with five days of induction (**Figure 4C**). Thus, TB medium resulted  
357 in higher yields compared to both LB and 2x YT media, and after a shorter period  
358 of time.

359

360 **Figure 4: Hsp90 overproduction lead to the highest yields in TB medium.**

361 *Hsp90 overproduction after 1 day (A), 3 days (B), 5 days (C) of induction. Lane 1:*  
362 *protein marker, lane 2: uninduced sample, lane 3-8: protein production at 16°C,*  
363 *lane 9-14: protein production at 18°C, lane 3-5 and 9-11: induction at low OD<sub>600</sub>,*  
364 *lane 6-8 and 12-14: induction at high OD<sub>600</sub>, lane 3, 6, 9, 12: induction with 0.1*  
365 *mM IPTG, lane 4, 7, 10, 13: induction with 0.25 mM IPTG, lane 5, 8, 11, 14:*  
366 *induction with 0.5 mM IPTG, lane 15: purified Hsp90 sample. EF-Tu intrinsic E.*  
367 *coli protein band was used for quantification of Hsp90 overproduction.*

368

369 **Quantification of overproduction gels revealed that the richness of the**  
370 **medium and the length of induction are the most significant parameters for**  
371 **Hsp90**

372 To compare the protein production results of the different gels we estimated  
373 Hsp90 overproduction by gel densitometry as described in Figure 1B. In LB  
374 medium we observed low level of Hsp90 overproduction in each condition  
375 **(Figure 5A)**. The tendency improved with the length of induction but even after  
376 five days the yields were insufficient for preparative purposes in all conditions.

377

378 **Figure 5: Quantification of Hsp90 overproduction in different media. (A)**  
379 *Summary of the quantification of Hsp90 overproduction in LB, after 1 day (white),*  
380 *3 days (grey) and 5 days (black) of induction. Average of results of all conditions*  
381 *(1<sup>st</sup> column group), average of results on 16°C and 18°C (2<sup>nd</sup> and 3<sup>rd</sup> column*  
382 *groups), average of results at low or high OD<sub>600</sub> at induction (4<sup>th</sup> and 5<sup>th</sup> column*

383 *groups), average of results at 0.1, 0.25 and 0.5 mM IPTG concentration (6<sup>th</sup> to 8<sup>th</sup>*  
384 *column groups). The length of induction is the only variable that influences Hsp90*  
385 *production. (B) Summary of the quantification of Hsp90 overproduction in 2x YT.*  
386 *The length of induction is the only variable that influences Hsp90 production. The*  
387 *yield is higher in 2x YT compared to LB. The structure of the chart is as in (A). (C)*  
388 *Summary of the quantification of Hsp90 overproduction in TB. The length of*  
389 *induction is the only variable that has a significant effect on Hsp90 production.*  
390 *The yield is higher in TB compared to LB and 2x YT. The structure of the chart is*  
391 *as in (A).*

392

393 We noted similar trends in case of 2x YT medium, the level of protein  
394 overproduction was insufficient and had similar yields after one and three days of  
395 induction (**Figure 5B**). After five days of induction in 2x YT, however, Hsp90  
396 overproduction was still insignificant. Just like in LB, the other varied conditions  
397 did not modulate Hsp90 levels in this medium. In 2x YT medium the yield was  
398 higher in every condition compared to LB.

399 Hsp90 overproduction in TB was significantly higher than in the other two  
400 media. The length of induction had a significant effect on the Hsp90 yields, and  
401 here we reached good yields already after three days. The other tested  
402 parameters did not influence the Hsp90 yield in TB.

403 Overall we concluded that the quantification of the gels in Figure 2, 3 and 4  
404 confirmed our observations about the overproduction gels (**Figure 5A, B and C,**  
405 **respectively**). We found that of the tested parameters, richness of medium used

406 for culturing *E. coli* cells and the length of induction were the only two that had a  
407 significant effect on Hsp90 overproduction and should be considered in the  
408 future. Temperature, OD<sub>600</sub> at induction and IPTG concentration used for  
409 induction did not significantly modulate the yields of the chaperone within the  
410 tested intervals.

411

#### 412 ***Recombinant human Hsp90 $\beta$ purified in one day***

413 After successful protein overproduction, we set out to optimise a fast, efficient  
414 and trustworthy purification protocol to ensure excellent sample quality. This was  
415 necessary because like other multi-domain proteins, human Hsp90 $\beta$  is also prone  
416 to the degradation. Its accessible, flexible regions, especially the charged linker  
417 between the N-terminal domain and the middle domain is often targeted by  
418 proteases, causing N-terminal degradation. Widely used purification protocols  
419 include time-consuming purification steps (such as dialysis, size exclusion  
420 chromatography or both) that slow down the procedure which may have  
421 detrimental effects on protein quality (16-19).

422 To avoid degradation that might occur as a consequence of long  
423 purification procedures and eventual freeze-thaw steps, we set out to develop a  
424 condensed protocol for purification of Hsp90 in one day that results in highly pure  
425 and stable sample. We purified N-terminally His<sub>6</sub>-tagged Hsp90 protein by Ni-  
426 affinity chromatography, anion exchange and heparin affinity chromatography  
427 (**Figure 6A**). To ensure sample quality and avoid degradation we carried out the  
428 experiment in the presence of protease inhibitors at low temperature (0-4°C). To

429 check for protein quality throughout the purification process we ran samples of  
430 the peak fractions of each column on sodium dodecyl sulfate polyacrylamide gel  
431 electrophoresis (SDS-PAGE) (**Figure 6B**). We observed a gradual gain in purity  
432 and loss in degradation products and impurities. After the last step the new  
433 Hsp90 purification protocol resulted in a protein sample free of any significant  
434 contaminations detectable by Coomassie staining. The combination of the three  
435 columns was necessary for high sample purity and reproducibility.

436

437 **Figure 6: The Hsp90 sample was free of degradation products and**  
438 **impurities after the three-step purification procedure.** (A) Schematic overview  
439 of the Hsp90 purification procedure. After cell disruption and centrifugation, the  
440 lysate was loaded first on a POROS 20MC Ni-column followed by a POROS  
441 20HQ anion exchange column. Next, the sample was loaded on a heparin affinity  
442 chromatography column. Finally, the eluted protein sample was concentrated,  
443 buffer-exchanged and flash frozen. The time frame of the experiment is indicated  
444 on the bottom of the figure. The SDS-PAGE panels on the arrows show the purity  
445 of the samples after each purification step. (B) SDS-PAGE shows the purity of the  
446 Hsp90 sample after each purification step. Lane 1: peak fraction sample after  
447 POROS 20MC affinity chromatography purification step, lane 2: peak fraction  
448 sample after POROS 20HQ anion exchange purification step, lane 3: peak  
449 fraction sample after heparin affinity chromatography purification step.

450

451 Certain biochemical and biophysical experiments are carried out at a higher,  
452 physiological temperature (37°C) and for elevated time intervals (days or  
453 months). In case of proteins that are sensitive to proteolysis, incubation at high  
454 temperature for longer time can be detrimental for sample quality. To test the  
455 stability of the Hsp90 sample purified by the new protocol we incubated the  
456 protein at 4, 21 and 37°C and ran samples taken at 3, 18 and 24 hours on SDS-  
457 PAGE. We visualised Hsp90 in the gels first with Coomassie (**Figure 7A**) and  
458 subsequently, with more sensitive silver staining (**Figure 7B**).

459

460 **Figure 7: Purified Hsp90 sample incubated on physiological temperature for**  
461 **one day remained free of degradation products.** (A) SDS-PAGE about the  
462 stability of the purified Hsp90 sample. Protein marker (lane 1), Hsp90 incubated  
463 for 0 hours (lane 2), Hsp90 incubated at 4°C (lane 3-5), 21°C (lane 6-8), 37°C  
464 (lane 9-11), Hsp90 incubated for 3 hours (lane 3, 6, 9), 18 hours (lane 4, 7, 10),  
465 24 hours (lane 5, 8, 11). (B) Silver staining about the stability of the purified  
466 Hsp90 sample. Protein marker (lane 1), Hsp90 incubated for 0 hours (lane 2),  
467 Hsp90 incubated at 4°C (lane 3-5), 21°C (lane 6-8), 37°C (lane 9-11), Hsp90  
468 incubated for 3 hours (lane 3, 6, 9), 18 hours (lane 4, 7, 10), 24 hours (lane 5, 8,  
469 11).

470

471 No additional degradation products appeared in the incubated samples compared  
472 to the starting sample within the time frame of the experiment on the Coomassie-  
473 stained gels (**Figure 7A**). Therefore we concluded that Hsp90 purified using the

474 new purification protocol was stable if incubated at 37°C up to 24 hours. Since  
475 Coomassie staining has limited sensitivity especially in the range of low molecular  
476 weight, we further examined silver staining to further examine the stability of the  
477 sample by silver staining (**Figure 7B**). Here, we observed impurities and/or  
478 degradation products in every sample but we did not see a systematic increase of  
479 any bands upon incubation at 37°C up to 24 hours.

480 This newly optimised, reproducible purification protocol enabled us to  
481 prepare a highly pure, stable and homogeneous sample within one day.

482

483 ***Hsp90 purified by our method was properly folded, had the correct***  
484 ***molecular weight and sedimentation coefficient***

485 To reveal the folding status of proteins, we analysed our Hsp90 samples with  
486 circular dichroism spectroscopy (CD) that can potentially reveal the secondary  
487 structure composition and folding status of the chaperone. The CD spectrum of  
488 Hsp90 revealed that the chaperone is mainly composed of  $\alpha$ -helices (**Figure 8A**).  
489 We observed two minima at ~209 nm and at ~ 222 nm and a maximum at ~ 194  
490 nm in the spectrum which is in agreement with the previous findings (Prodromou  
491 et al, 1999).

492

493 ***Figure 8: Purified Hsp90 sample folded, sedimented correctly and its***  
494 ***molecular mass was appropriate. (A) CD spectrum of Hsp90 at 1.2  $\mu$ M***  
495 ***monomer concentration. The overall structure of the protein typically consists of***  
496  ***$\alpha$ -helices. (B) The AUC spectrum of Hsp90 at 7.2  $\mu$ M monomer concentration.***

497 *Hsp90 dimers sediment with 5.6 S, whereas Hsp90 tetramers appear at 10.6 S.*  
498 *(C) SEC-MALLS spectra of the purified Hsp90 sample at 2.2  $\mu$ M monomer*  
499 *concentration. The protein has the molecular weight of the dimer Hsp90 is 167.5*  
500  *$\pm$  13.3 kDa. The peak maximum is at 10.07 ml. Red line: light scattering, blue*  
501 *line: refractive index, green line: UV absorption at 220 nm, black dotted line: fit for*  
502 *molecular mass.*

503

504 To ensure that our Hsp90 sample had the correct molecular weight and did not  
505 degrade during the purification process we measured its molecular weight using  
506 size exclusion chromatography - multi angle laser light scattering (SEC-MALLS)  
507 (**Figure 8B**). We observed a homogeneous peak at 10.07 ml that was fitted to  
508  $167.5 \pm 13.3$  kDa. This result corroborates with the expected size of two Hsp90  
509 molecules (168.2 kDa), confirming that our sample is in a dimeric state at the  
510 concentration used in the experiment and also in agreement with data published  
511 earlier (Lepvrier et al, 2015, Moullintraffort et al, 2010). Taken together with the  
512 outcome of the stability experiments SEC-MALLS results suggested that our  
513 sample contained the intact full length Hsp90 dimer without degradation.

514 We measured the sedimentation coefficient of our Hsp90 sample to  
515 analyse sedimentation properties of the Hsp90 dimer. In the sedimentation profile  
516 of the chaperone we observed a peak at 5.6 S that corresponded to the dimer  
517 and a smaller peak at 10.6 S that was probably the tetramer molecule (dimer of  
518 dimers) (**Figure 8C**). The increasing fraction above 14 S suggested that the  
519 sample aggregated to some extent (but this is a typical phenomenon in case of



520 analytical ultracentrifugation (AUC) samples). Below 1 S we observed a small  
521 peak, that could have originated from impurities or degradation products.

## 522 **Discussion**

523 Human Hsp90 $\beta$  is often produced in baculovirus system in insect Sf9 cells that is  
524 expensive, requires long preparation steps and is often difficult to scale-up (20-  
525 22). Our optimised recombinant human Hsp90 $\beta$  production protocol in *E. coli*  
526 provides an attractive alternative for the baculovirus system.

527 First, we systematically tested the production of recombinant human  
528 Hsp90 $\beta$  in *E. coli* cells to identify parameters that modulate the yield of the  
529 chaperone. We showed that the length of induction and the nutrient level of the  
530 medium had significant effect on Hsp90 overproduction, whereas temperature,  
531 IPTG concentration and OD<sub>600</sub> at induction (within the tested intervals) did not  
532 significantly modify the yields of Hsp90. Induction for three days in TB medium  
533 resulted in good yield of the chaperone.

534 Moreover, we purified Hsp90 using a protocol that allowed us to finish  
535 within one day and resulted in well-folded, stable and pure sample. Since Hsp90  
536 is extremely sensitive to proteolysis because of its flexible linkers, fast  
537 preparation increases sample quality, in addition to being cheaper and time-  
538 efficient. Throughout the purification procedure impurities and degradation  
539 products disappeared from the sample and final product resisted further  
540 degradation upon incubation on elevated temperature for long time intervals.

541 Previous Hsp90 purification protocols often contained time consuming  
542 preparation steps such as dialysis, size exclusion chromatography or both that  
543 may affect protein quality (16-19). Using the combination of Ni-affinity  
544 chromatography, anion exchange and the Hsp90-specific heparin column allowed

545 us to get rid of degradation products and impurities in only three purification  
546 steps. The resulting sample was sufficiently pure and resistant to proteolytic  
547 degradation upon incubation on physiological temperature for up to one day, and  
548 showed expected biophysical properties (CD, SEC-MALLS).

549 In our AUC experiments human Hsp90 sedimented predominantly as a  
550 dimer with  $S=5.6$  and a small fraction as a tetramer with  $S=10.6$ . It is notable that  
551 human Hsp90 is known to be in extended conformation ( $D_{\max}=26$  nm) in the  
552 absence of nucleotide and co-chaperone p23 (10). Similarly to our results, earlier  
553 findings showed that in the absence of nucleotides, consequently in its extended  
554 conformation, yeast Hsp90 also had the sedimentation coefficient of 5.6 (23).  
555 These results indicate that these two proteins sediment similarly when in  
556 extended conformation. However, in the presence of ATP that stabilises compact  
557 conformation, yeast Hsp90 sedimented with the coefficient of 6.8, suggesting that  
558 structural rearrangements altered its sedimentation properties (23). In similar  
559 experiments Hsp90 sedimented with the coefficient of 6.1 (24). The variations  
560 between these results may be explained by the differences between the origin of  
561 the samples (porcine brain Hsp90 that has different post-translational  
562 modification pattern and was a mixture of  $\alpha$  and  $\beta$  isoform vs Hsp90), moreover,  
563 by buffer, salt and reducing agent conditions.

564 In summary, we optimised Hsp90 overproduction and a fast and efficient  
565 purification protocol for the protein. The resulting sample was pure, properly  
566 folded and resistant to degradation, consequently it is suitable for biochemical  
567 and biophysical experiments.

568 **Acknowledgements**

569 We are grateful to Ineke Braakman for continuous support. We thank Jonas M.  
570 Dörr for his help with CD experiments and data analysis. We thank Camilla de  
571 Nardis, Nadia O. Leloup and Remco N. P. Rodenburg, Deniz Ugurlar and Revina  
572 C. van Scherpenzeel for their help in setting up SEC-MALLS experiments and  
573 their support in data interpretation. We are grateful to Priyanka Sahasrabudhe for  
574 her comments on the manuscript.

575

576 **Author contributions**

577

578 Contribution to manuscript:

579 The concept of the study originates from M. Radli and S.G.D. Rüdiger.  
580 M. Radli drafted the first version of the manuscript and prepared all the figures in  
581 the chapter. M. Radli and S.G.D. Rüdiger wrote the manuscript.

582

583 Contribution to experiments:

584 M. Radli tested Hsp90 production, ran the SDS-PAGE gels and quantified Hsp90  
585 overproduction.

586 M. Radli optimised the purification of Hsp90 and purified all the protein used for  
587 the experiments in this chapter.

588 M. Radli tested the stability of Hsp90 on different temperatures.

589 M. Radli performed and analysed the analytical ultracentrifugation (AUC), SEC-  
590 MALLS and circular dichroism (CD) experiments.

- 591 D.B. Veprintsev supervised the AUC experiments, helped analyzing the data and  
592 interpreting the results.  
593 S.G.D. Rüdiger supervised the experiments.

594

## 595 **References**

596 (1) Balch WE, Morimoto RI, Dillin A, Kelly JW. Adapting proteostasis for disease  
597 intervention. *Science* 2008 Feb 15;319(5865):916-919.

598 (2) Tyedmers J, Mogk A, Bukau B. Cellular strategies for controlling protein  
599 aggregation. *Nat Rev Mol Cell Biol* 2010 Nov;11(11):777-788.

600 (3) Kim YE, Hipp MS, Bracher A, Hayer-Hartl M, Hartl FU. Molecular chaperone  
601 functions in protein folding and proteostasis. *Annu Rev Biochem* 2013;82:323-355.

602 (4) Buchberger A, Bukau B, Sommer T. Protein quality control in the cytosol and the  
603 endoplasmic reticulum: brothers in arms. *Mol Cell* 2010 Oct 22;40(2):238-252.

604 (5) Taipale M, Jarosz DF, Lindquist S. HSP90 at the hub of protein homeostasis:  
605 emerging mechanistic insights. *Nature Reviews Molecular Cell Biology* 2010  
606 Jul;11(7):515-528.

607 (6) Li J, Buchner J. Structure, function and regulation of the hsp90 machinery. *Biomed J*  
608 2013 May-Jun;36(3):106-117.

609 (7) Pearl LH. Review: The HSP90 molecular chaperone-an enigmatic ATPase.  
610 *Biopolymers* 2016 Aug;105(8):594-607.

611 (8) Wiech H, Buchner J, Zimmermann R, Jakob U. Hsp90 chaperones protein folding in  
612 vitro. *Nature* 1992;358(6382):169-170.

613 (9) Buchner J. Hsp90 & Co. - a holding for folding. *Trends Biochem Sci* 1999  
614 Apr;24(4):136-41.

- 615 (10) Karagöz GE, Duarte AMS, Akoury E, Ippel H, Biernat J, Morán Luengo T, et al.  
616 Hsp90-Tau complex reveals molecular basis for specificity in chaperone action.  
617 Cell 2014;156:963-974.
- 618 (11) Kirschke E, Goswami D, Southworth D, Griffin PR, Agard DA. Glucocorticoid  
619 receptor function regulated by coordinated action of the Hsp90 and Hsp70  
620 chaperone cycles. Cell 2014 Jun 19;157(7):1685-1697.
- 621 (12) Workman P. Combinatorial attack on multistep oncogenesis by inhibiting the Hsp90  
622 molecular chaperone. Cancer Lett 2004 Apr 8;206(2):149-57.
- 623 (13) Neckers L. Heat shock protein 90: the cancer chaperone. J Biosci 2007  
624 Apr;32(3):517-530.
- 625 (14) Hipp MS, Park SH, Hartl FU. Proteostasis impairment in protein-misfolding and -  
626 aggregation diseases. Trends Cell Biol 2014 Jun 16.
- 627 (15) Pedersen S, Bloch PL, Reeh S, Neidhardt FC. Patterns of protein synthesis in *E.*  
628 *coli*: a catalog of the amount of 140 individual proteins at different growth rates.  
629 Cell 1978 May;14(1):179-190.
- 630 (16) Jakob U, Meyer I, Bugl H, Andre S, Bardwell JC, Buchner J. Structural organization  
631 of procaryotic and eucaryotic Hsp90. Influence of divalent cations on structure and  
632 function. The Journal of biological chemistry 1995;270(24):14412-14419.
- 633 (17) Prodromou C, Siligardi G, O'Brien R, Woolfson DN, Regan L, Panaretou B, et al.  
634 Regulation of Hsp90 ATPase activity by tetratricopeptide repeat (TPR)-domain co-  
635 chaperones. EMBO J 1999;18(3):754-762.

- 636 (18) Richter K, Muschler P, Hainzl O, Buchner J. Coordinated ATP hydrolysis by the  
637 Hsp90 dimer. *The Journal of biological chemistry* 2001;276(36):33689-33696.
- 638 (19) Southworth DR, Agard DA. Client-loading conformation of the Hsp90 molecular  
639 chaperone revealed in the cryo-EM structure of the human Hsp90:Hop complex.  
640 *Mol Cell* 2011 Jun 24;42(6):771-781.
- 641 (20) Freeman BC, Morimoto RI. The human cytosolic molecular chaperones hsp90,  
642 hsp70 (hsc70) and hdj-1 have distinct roles in recognition of a non-native protein  
643 and protein refolding. *EMBO J* 1996 Jun 17;15(12):2969-2979.
- 644 (21) Buchner J, Bose S, Mayr C, Jakob U. Purification and characterization of  
645 prokaryotic and eukaryotic Hsp90. *Methods Enzymol* 1998;290:409-418.
- 646 (22) Verba KA, Wang RY, Arakawa A, Liu Y, Shirouzu M, Yokoyama S, et al. Atomic  
647 structure of Hsp90-Cdc37-Cdk4 reveals that Hsp90 traps and stabilizes an  
648 unfolded kinase. *Science* 2016 Jun 24;352(6293):1542-1547.
- 649 (23) Hessling M, Richter K, Buchner J. Dissection of the ATP-induced conformational  
650 cycle of the molecular chaperone Hsp90. *Nat Struct Mol Biol* 2009 Mar;16(3):287-  
651 293.
- 652 (24) Garnier C, Barbier P, Devred F, Rivas G, Peyrot V. Hydrodynamic properties and  
653 quaternary structure of the 90 kDa heat-shock protein: effects of divalent cations.  
654 *Biochemistry* 2002 Oct 1;41(39):11770-11778.



A

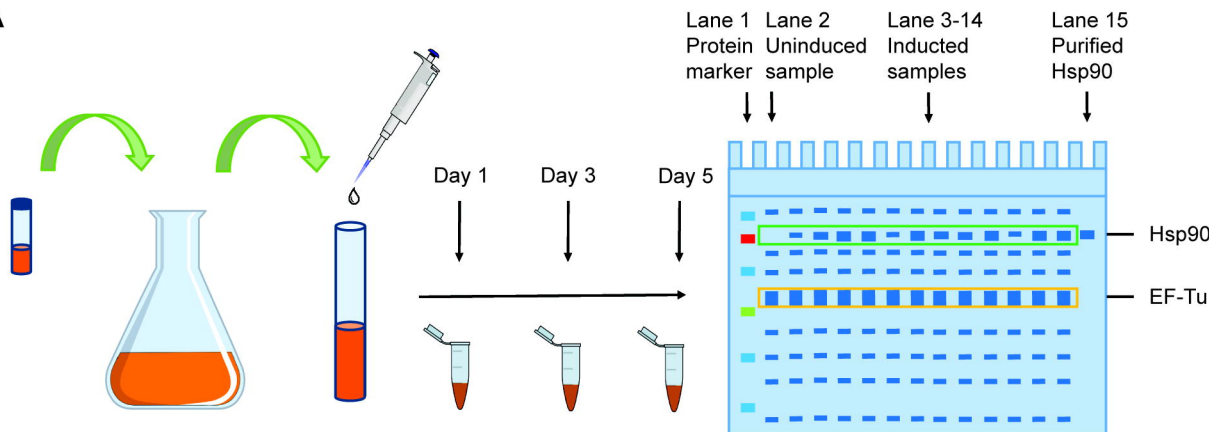

B

Lane profiles before adjustments

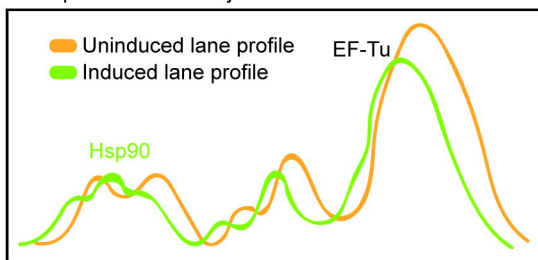

Normalisation and alignment of induced lane profile

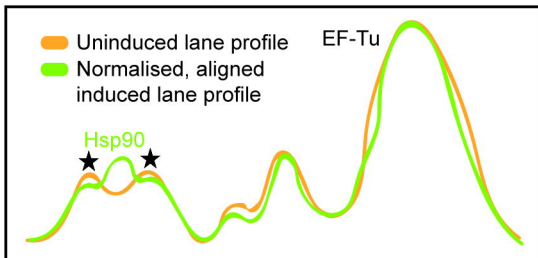

Surface area of the Hsp90 peak

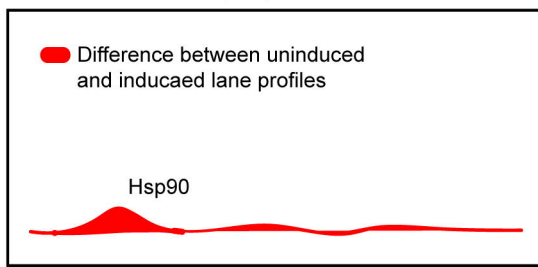

**A**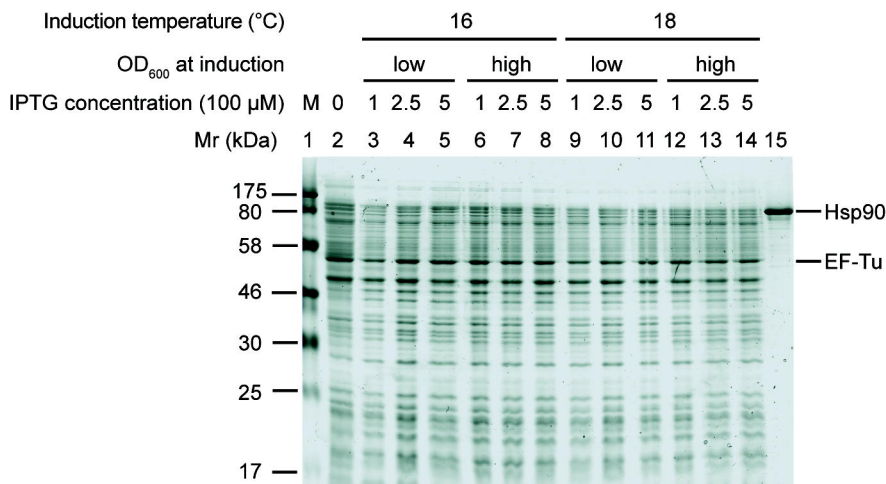**B**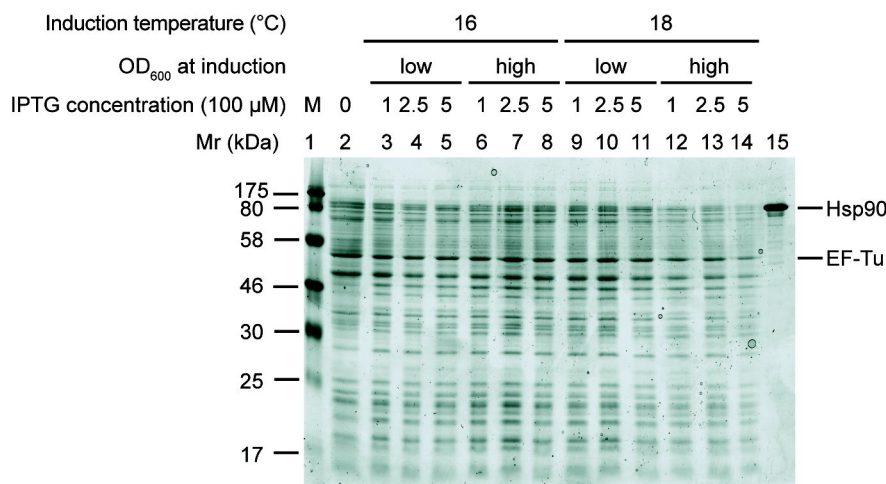**C**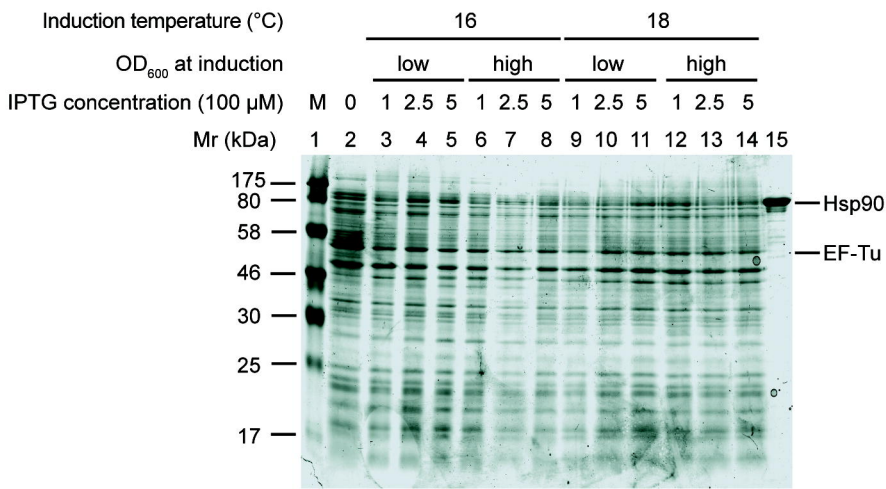

**A**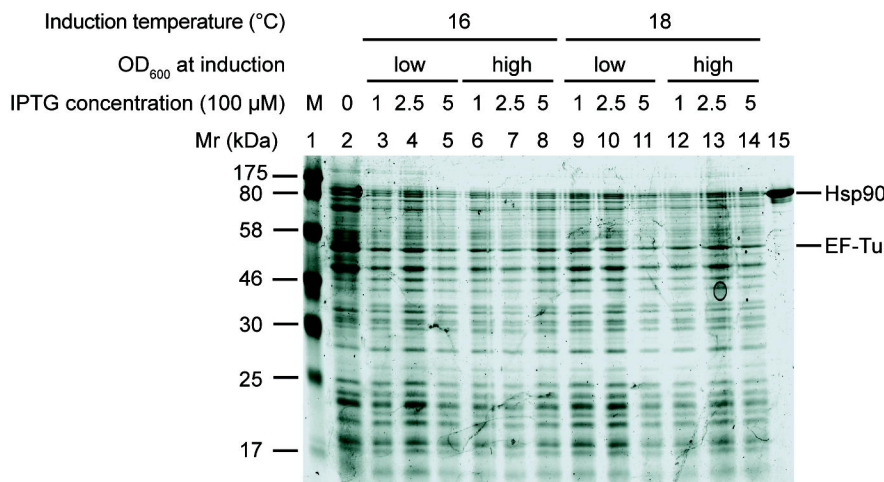**B**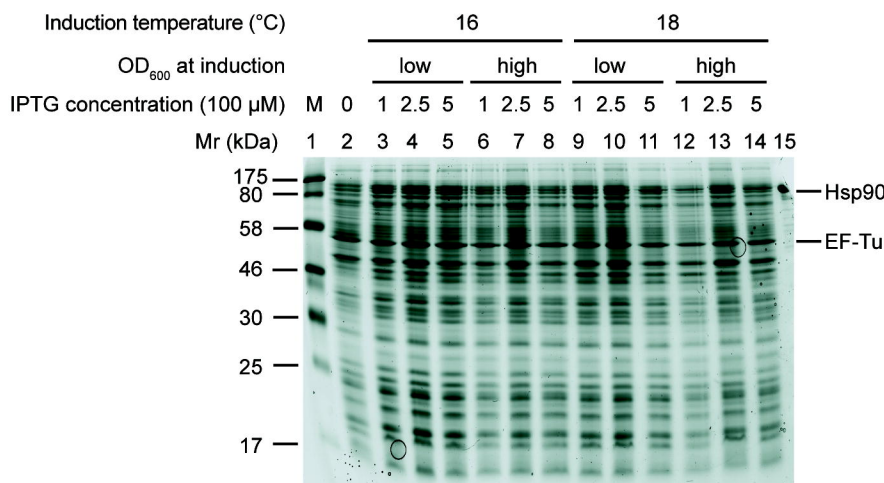**C**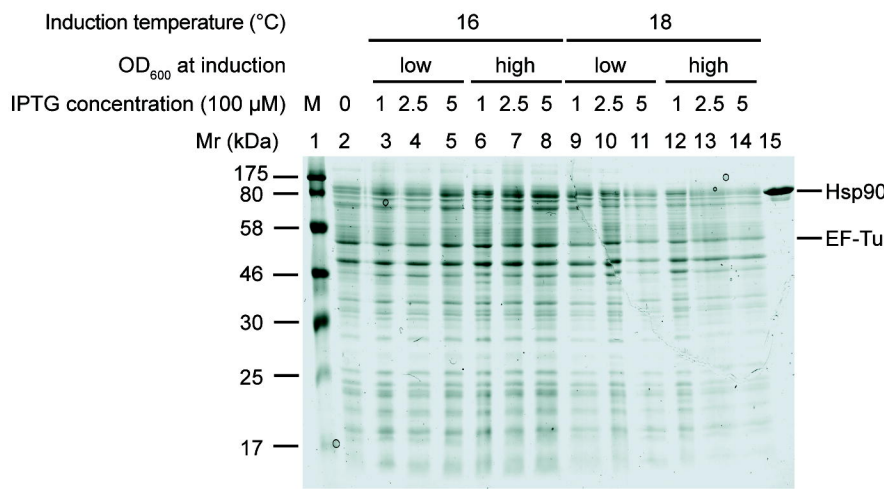

**A**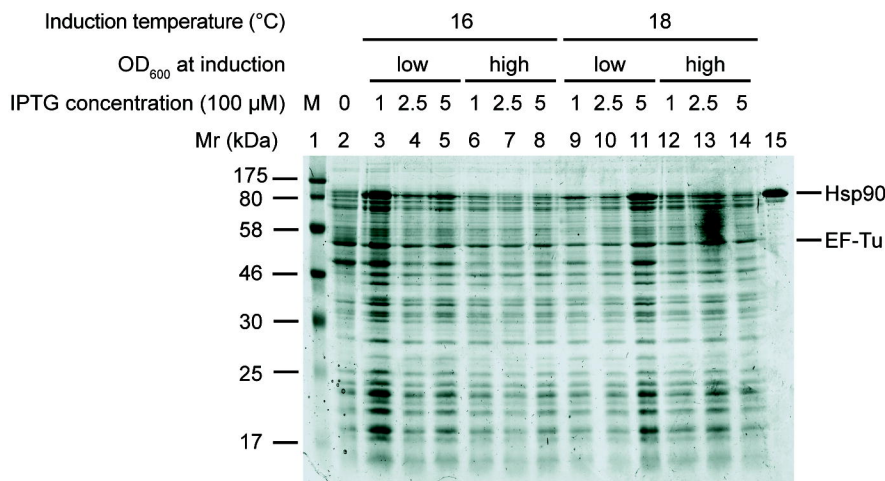**B**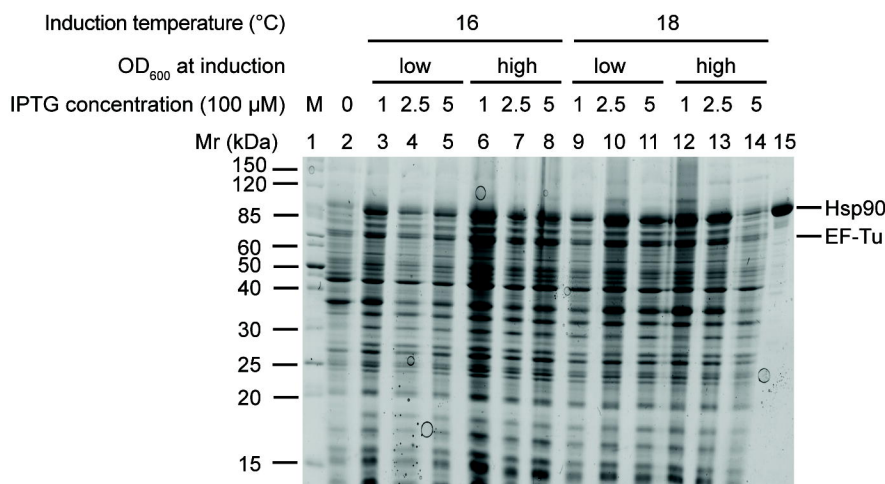**C**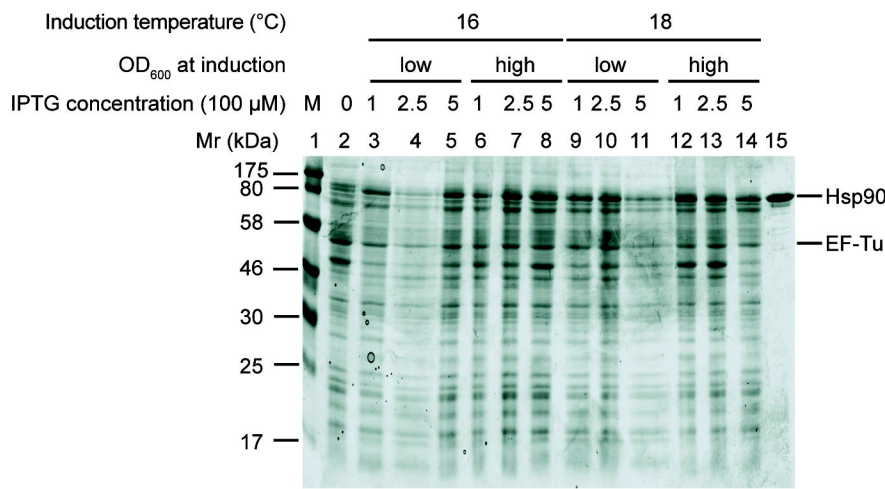

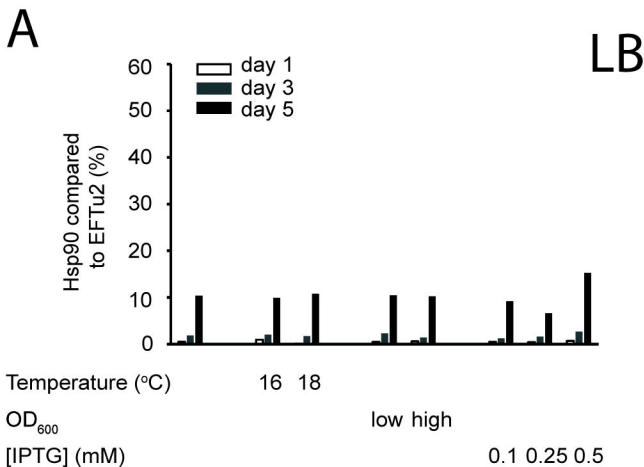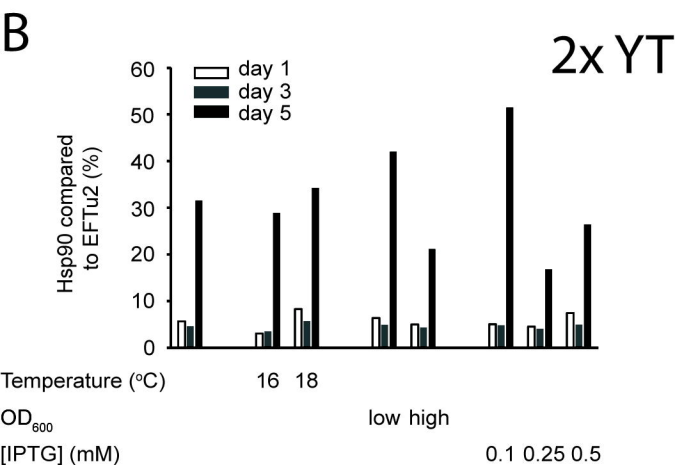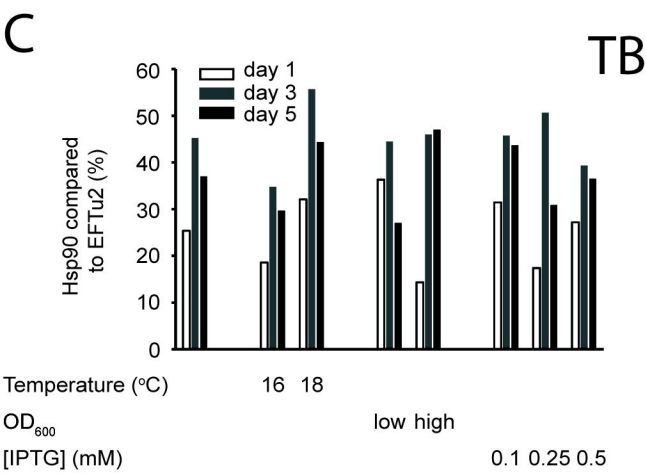

A

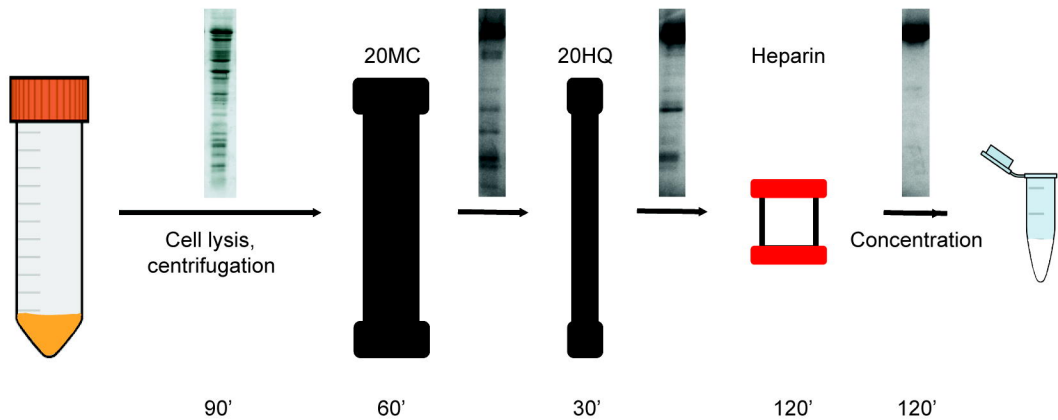

B

After column    20MC    20HQ    Heparin

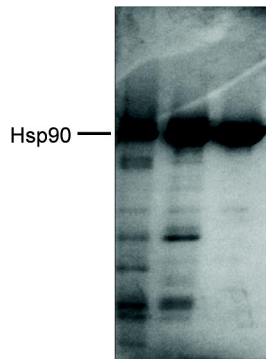

**A**

Incubation temperature (°C)

4

21

37

Incubation time (h)

0

3

18

24

3

18

24

3

18

24

Mr (kDa)

180—

100—

70—

55—

40—

35—

25—

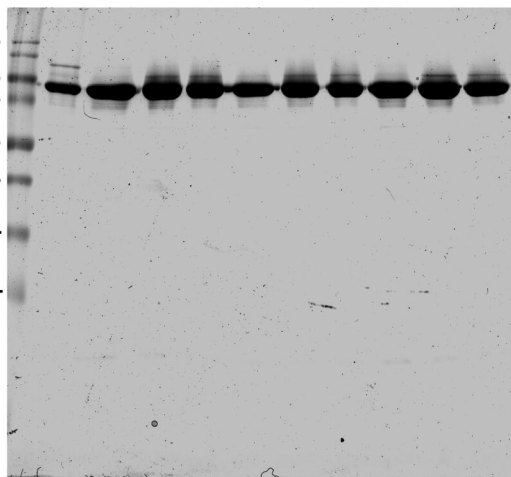**B**

Incubation temperature (°C)

4

21

37

Incubation time (h)

0

3

18

24

3

18

24

3

18

24

Mr (kDa)

180—

100—

70—

55—

40—

35—

25—

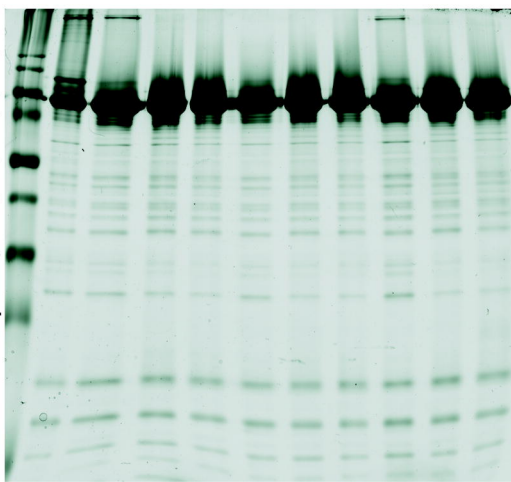

**A**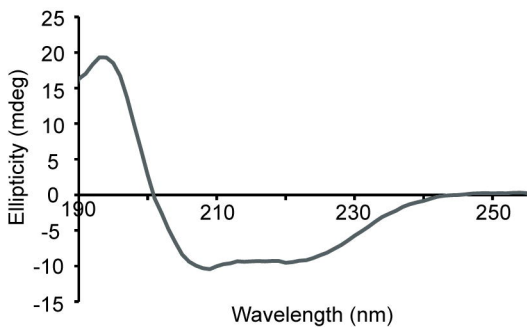**B**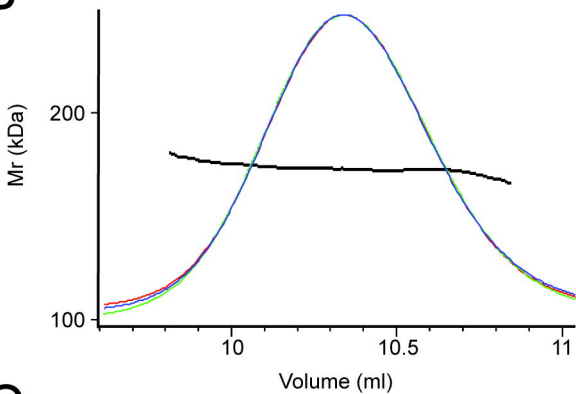**C**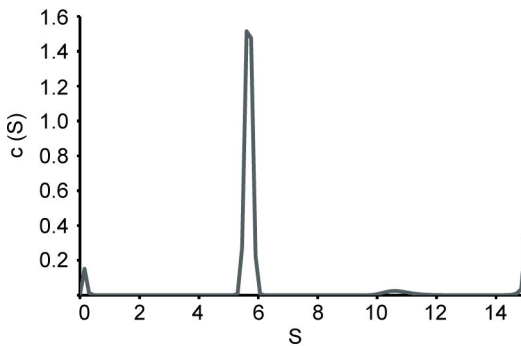

Source: http://biorxiv.org/content/10.1101/121996v2.full.pdf
